# Supplementary material for: Comparative Genomics and Transcriptomics Analyses Reveal Divergent Lifestyle Features of Nematode Endoparasitic Fungus Hirsutella minnesotensis
Source: PubMed Central journal article supplement (PMC4255773; doi:10.1093/gbe/evu241), 2014-10-30
Supplement: supp_evu241_Figure_S.pdf [file supp_evu241_Figure_S.pdf]

| Classification                                |             | Structure | <i>H. minnesotensis</i>       |                       |                     |
|-----------------------------------------------|-------------|-----------|-------------------------------|-----------------------|---------------------|
| Order                                         | Superfamily |           | Number of Consensus Sequences | Number of Occurrences | % Assembly Coverage |
| <b>Class I (retrotransposons)</b>             |             |           |                               |                       |                     |
| LTR                                           | Copia       |           | 70                            | 2,035                 | 4.60%               |
|                                               | Gypsy       |           | 93                            | 2,880                 | 7.18%               |
|                                               | Others LTR  |           | 15                            | 590                   | 2.22%               |
| LINE                                          | I           |           | 47                            | 2,260                 | 4.50%               |
|                                               | R2          |           | 1                             | 7                     | 0.03%               |
|                                               | Others LINE |           | 3                             | 86                    | 0.14%               |
| SINE                                          |             |           | 2                             | 15                    | 0.01%               |
| Elements confused                             |             |           | 102                           | 2,789                 | 4.93%               |
| <b>Class II (DNA transposons)- Subclass 1</b> |             |           |                               |                       |                     |
| TIR                                           | Tc1-Mariner |           | 62                            | 1,720                 | 3.03%               |
|                                               | hAT         |           | 54                            | 2,012                 | 2.57%               |
|                                               | MuDR        |           | 27                            | 1,048                 | 1.72%               |
|                                               | PiggyBac    |           | 14                            | 272                   | 0.51%               |
|                                               | P           |           | 3                             | 41                    | 0.07%               |
|                                               | Others TIR  |           | 7                             | 184                   | 0.20%               |
| <b>Class II (DNA transposons)- Subclass 2</b> |             |           |                               |                       |                     |
| Helitron                                      | Helitron    |           | 9                             | 430                   | 1.45%               |
| Elements confused                             |             |           | 12                            | 191                   | 0.26%               |
| <b>Elements not categorized</b>               |             |           | <b>14</b>                     | <b>594</b>            | <b>1.23%</b>        |
| <b>Total</b>                                  |             |           | <b>535</b>                    | <b>17,154</b>         | <b>34.67%</b>       |

Fig. S1

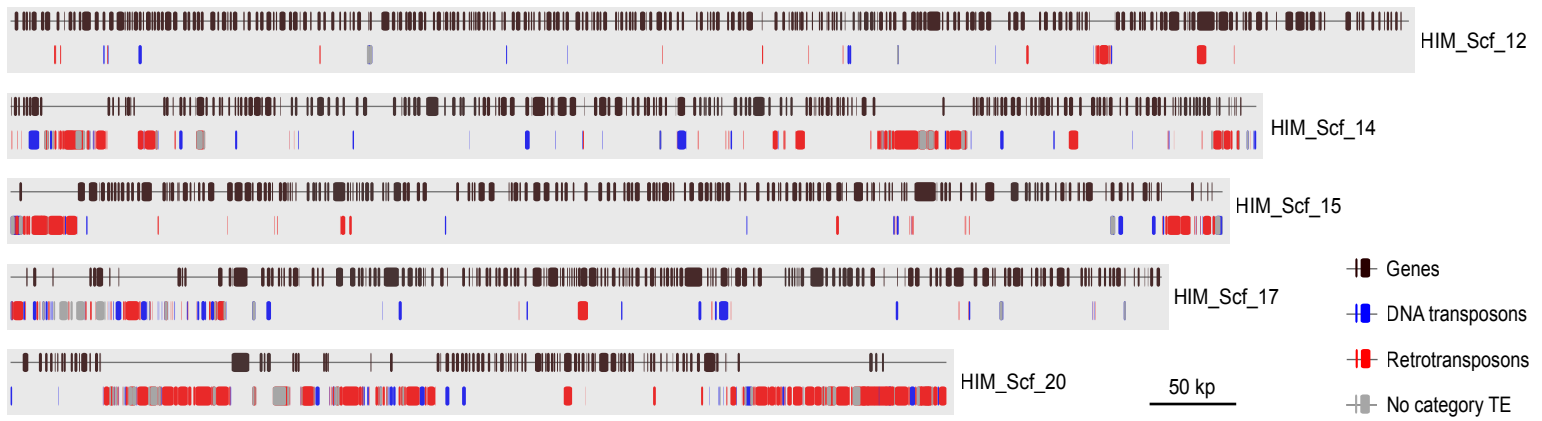

Fig. S2

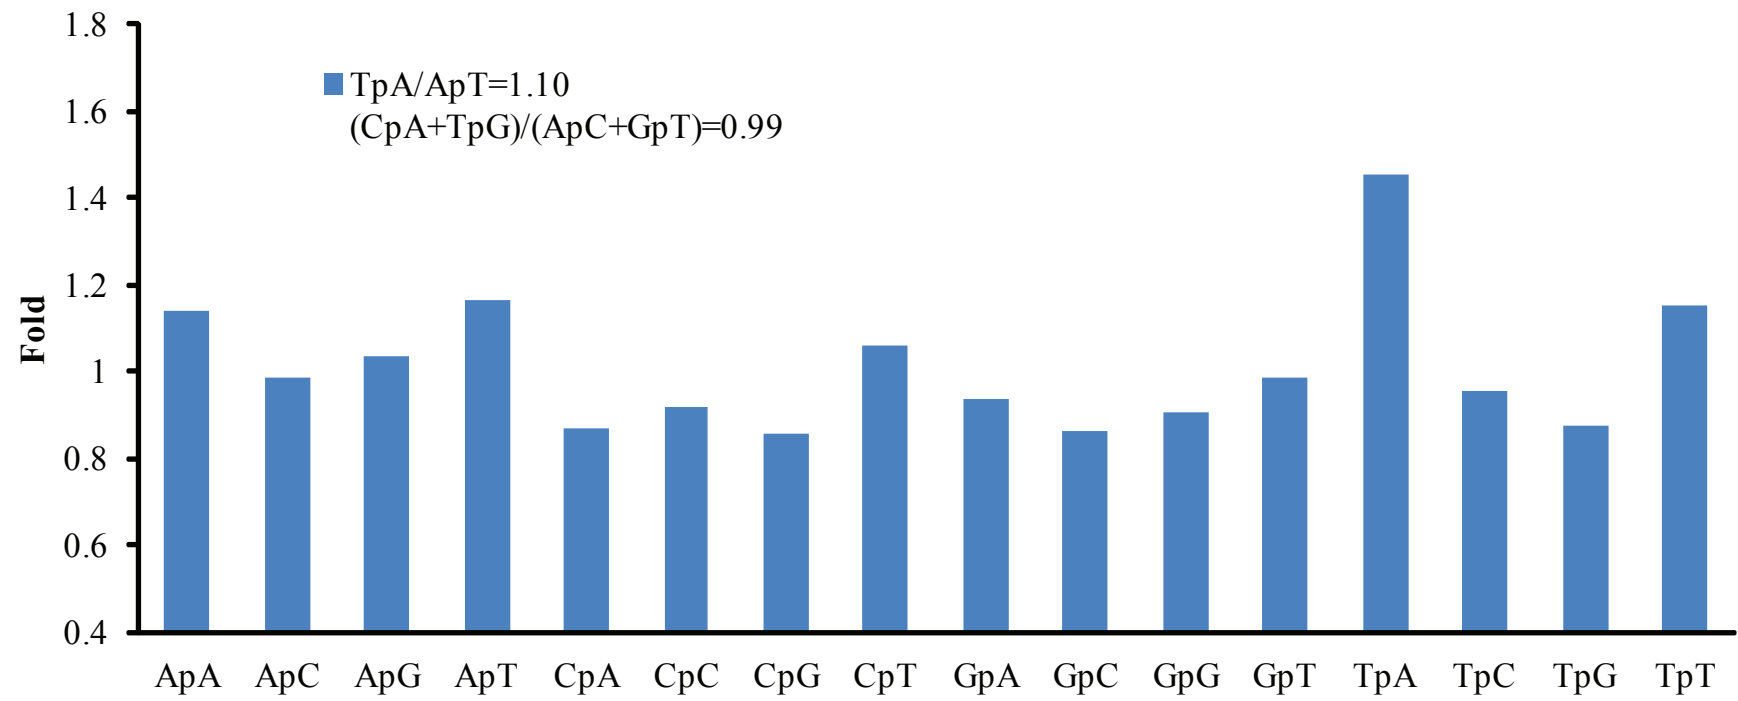

Fig. S3

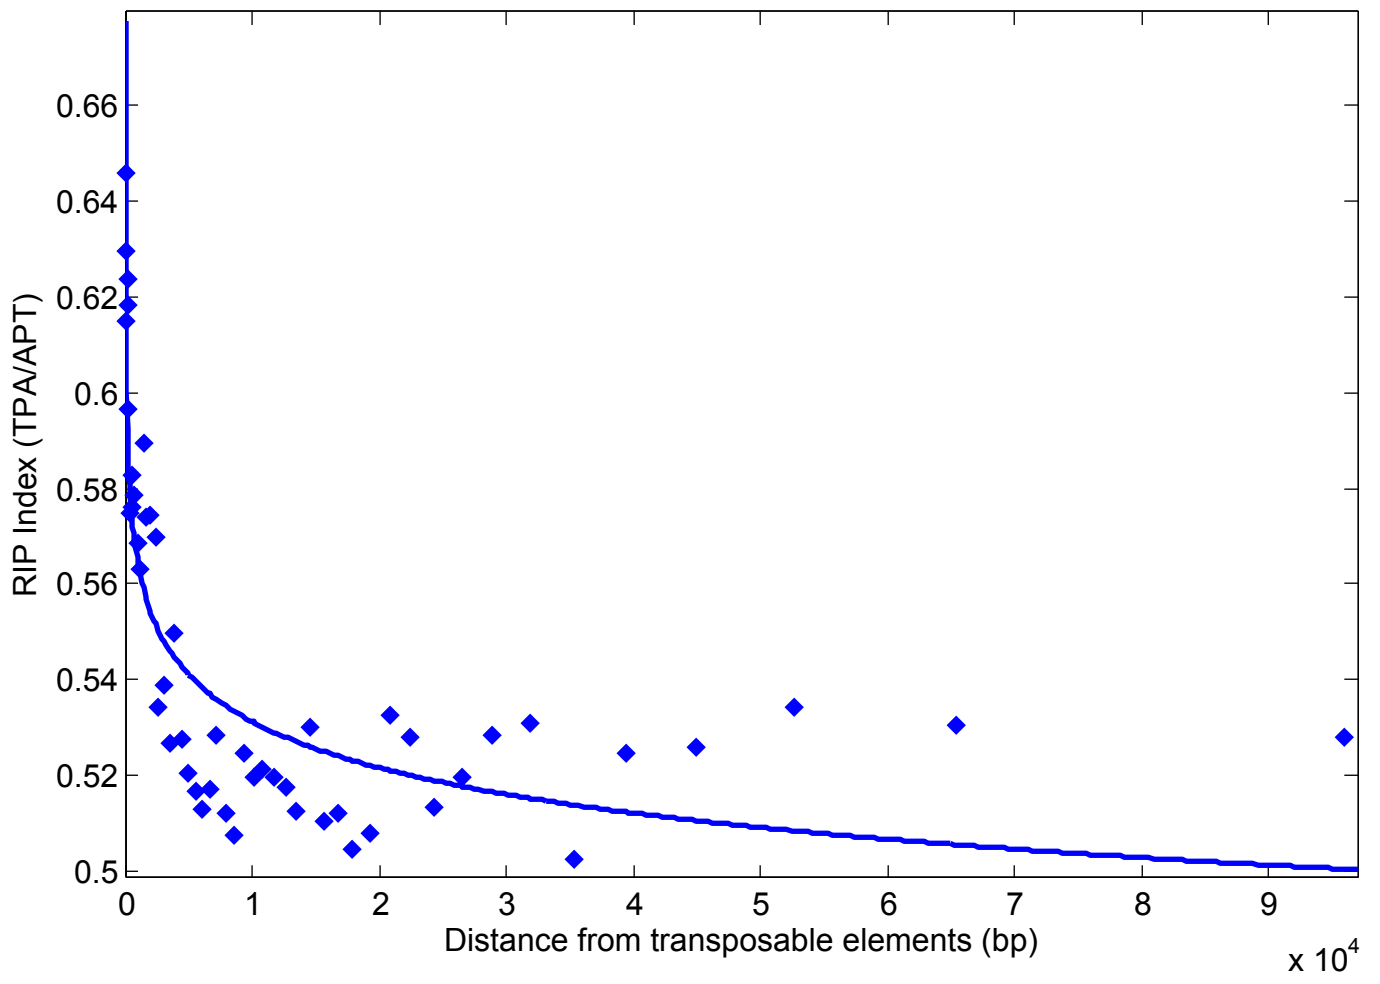

Fig. S4

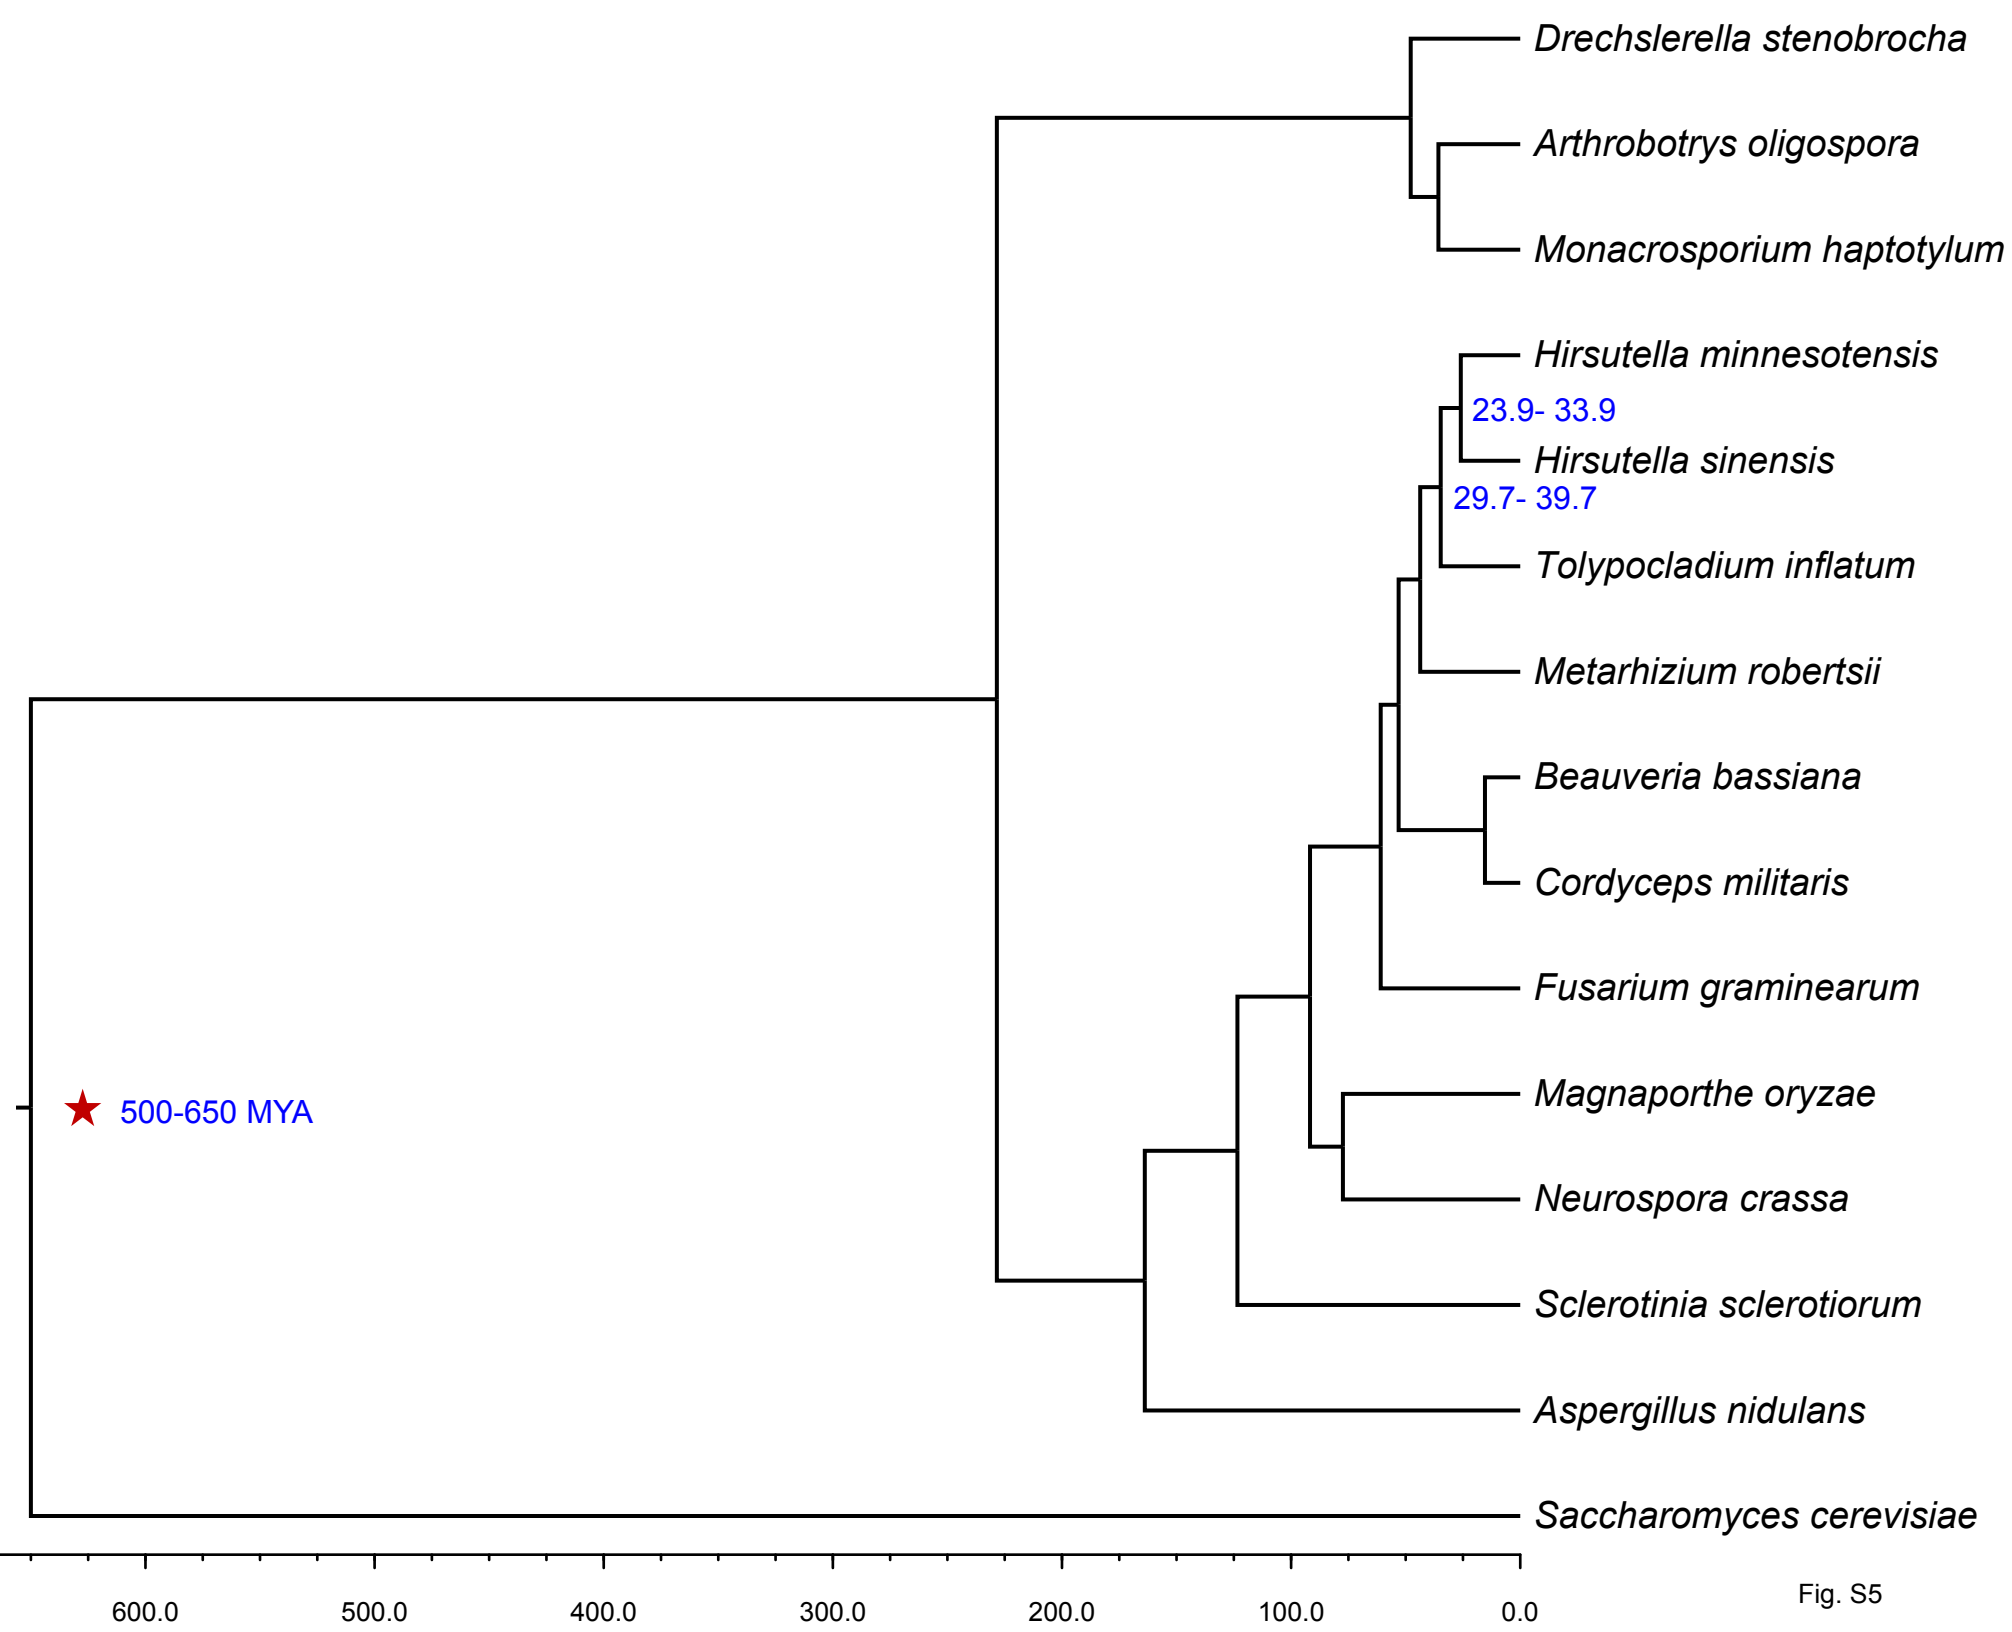

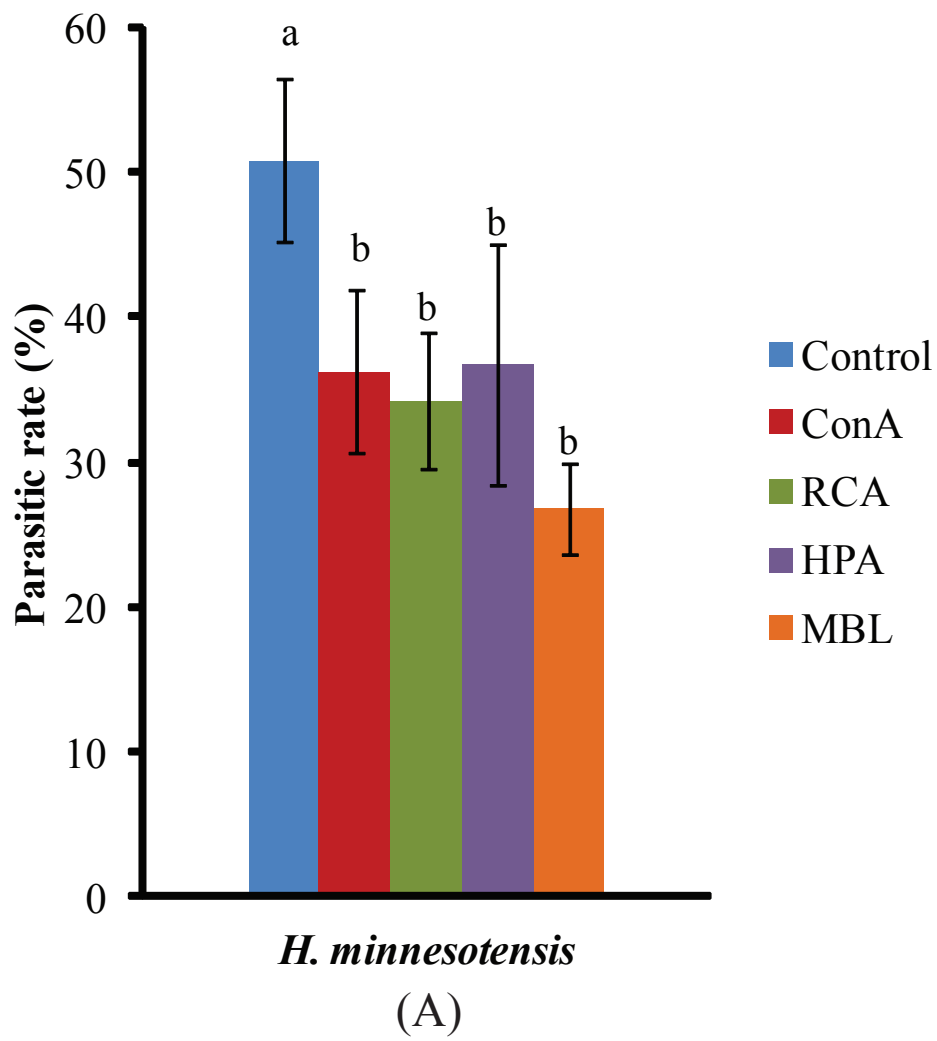

(A)

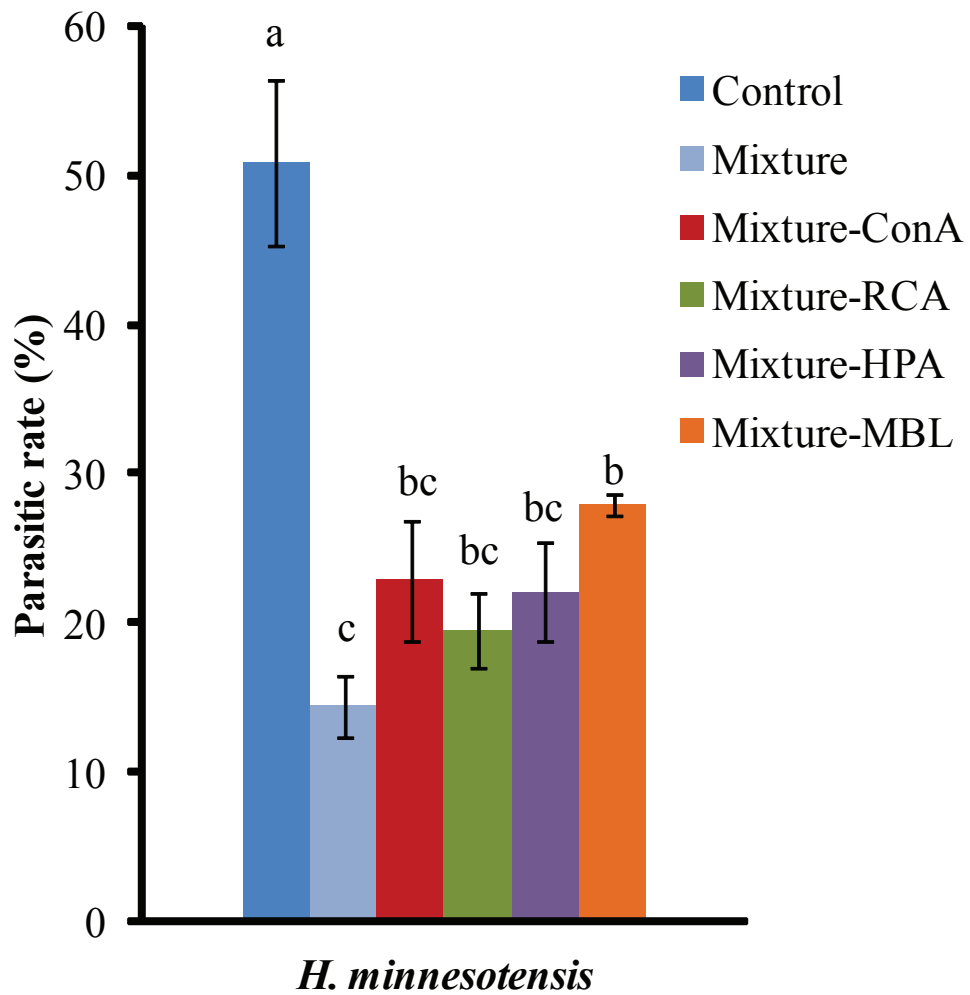

(B)

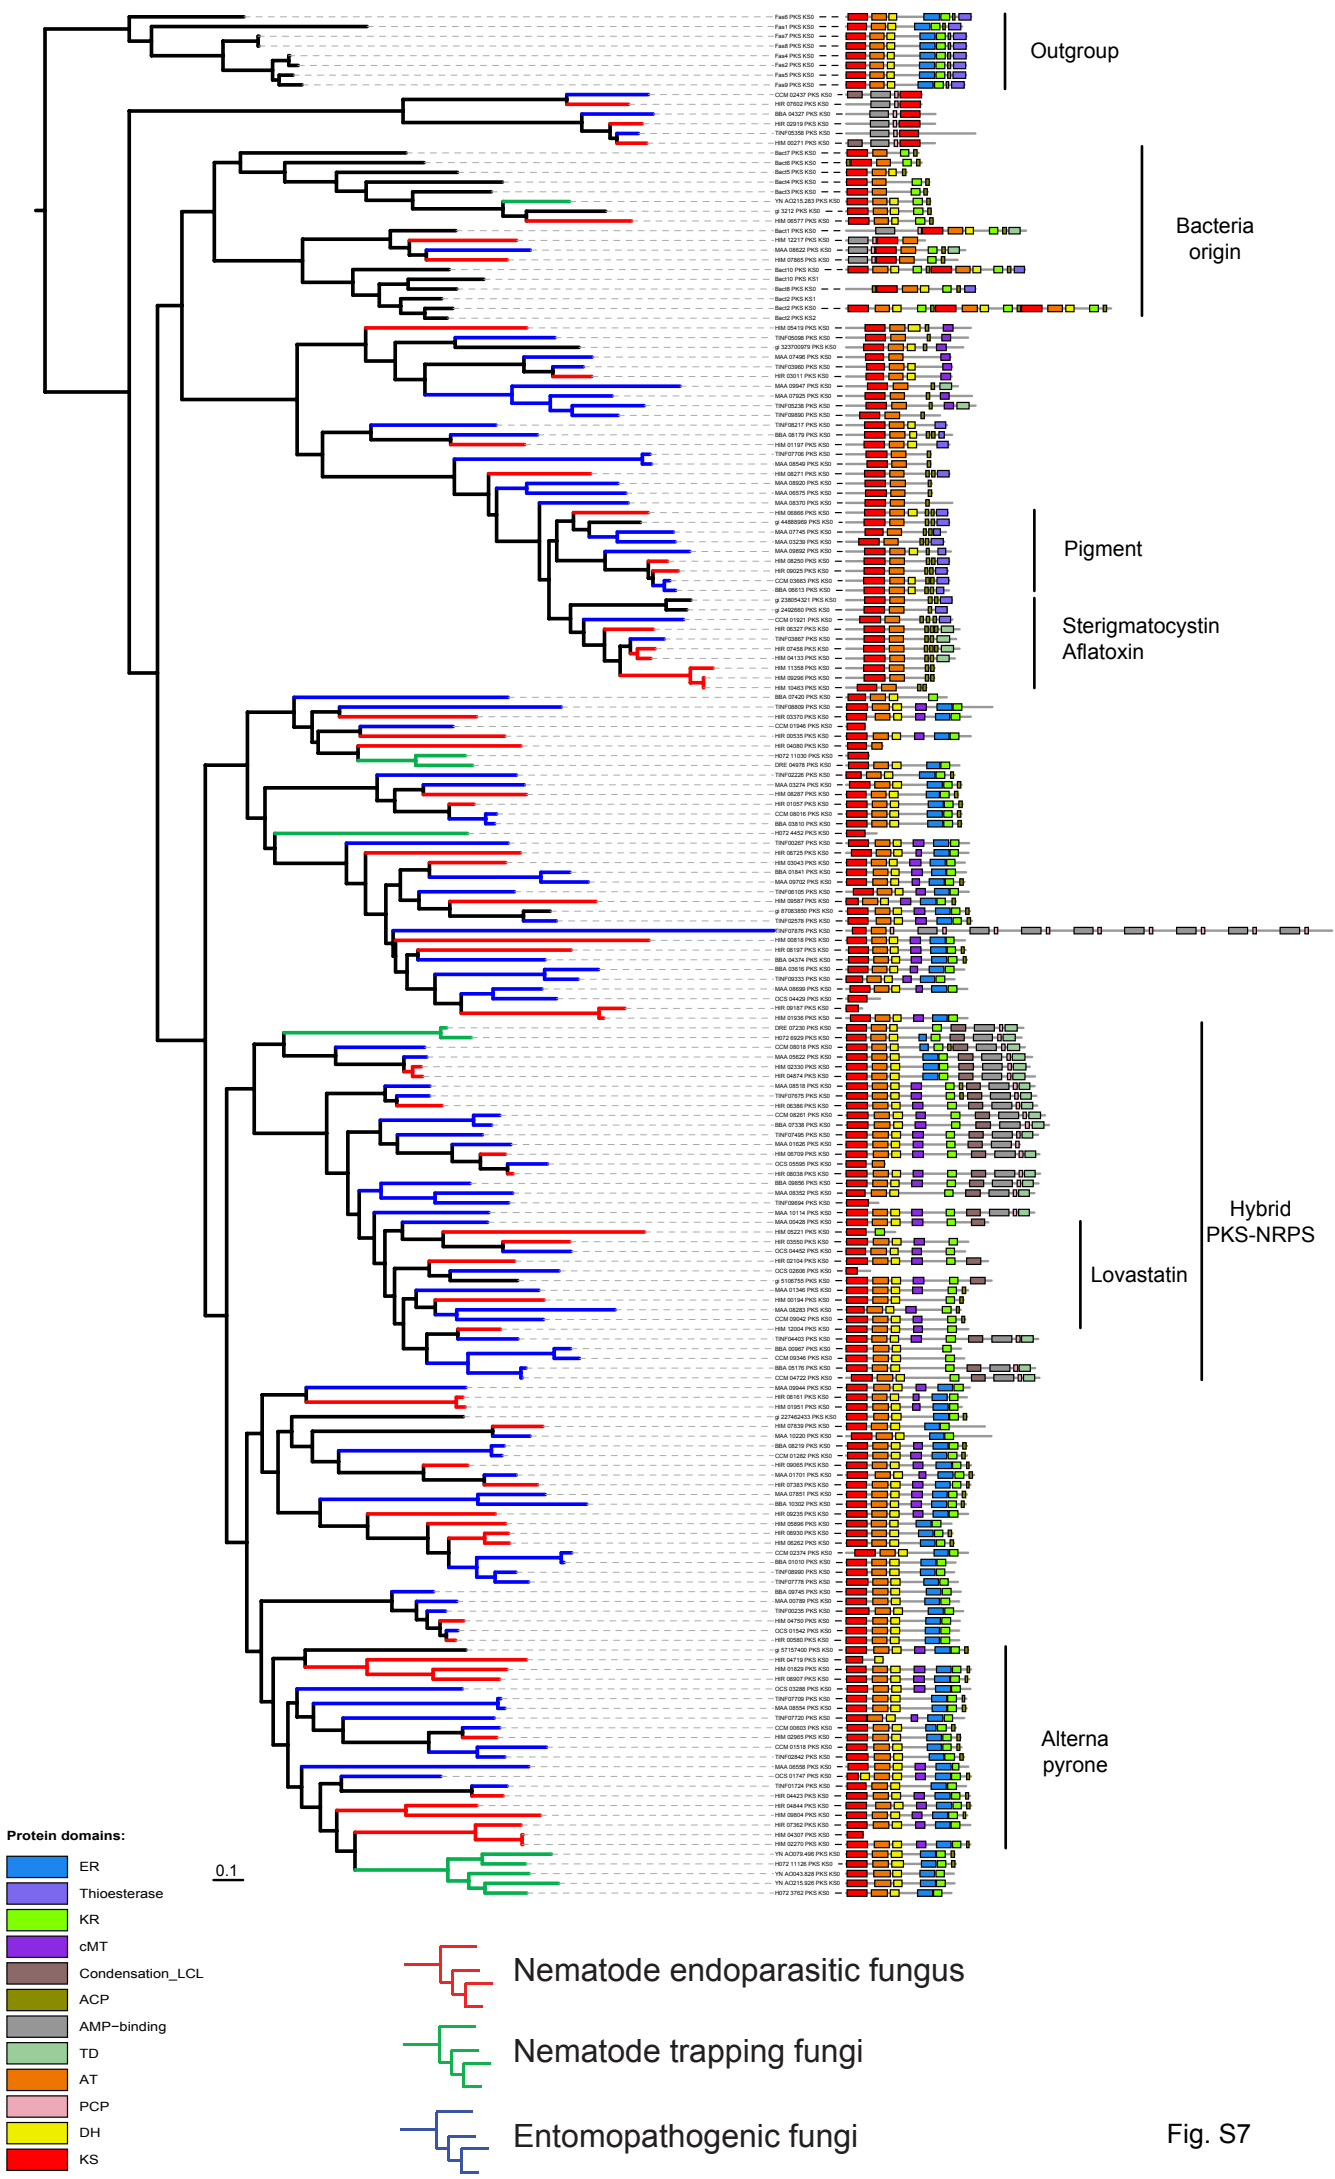

Fig. S7

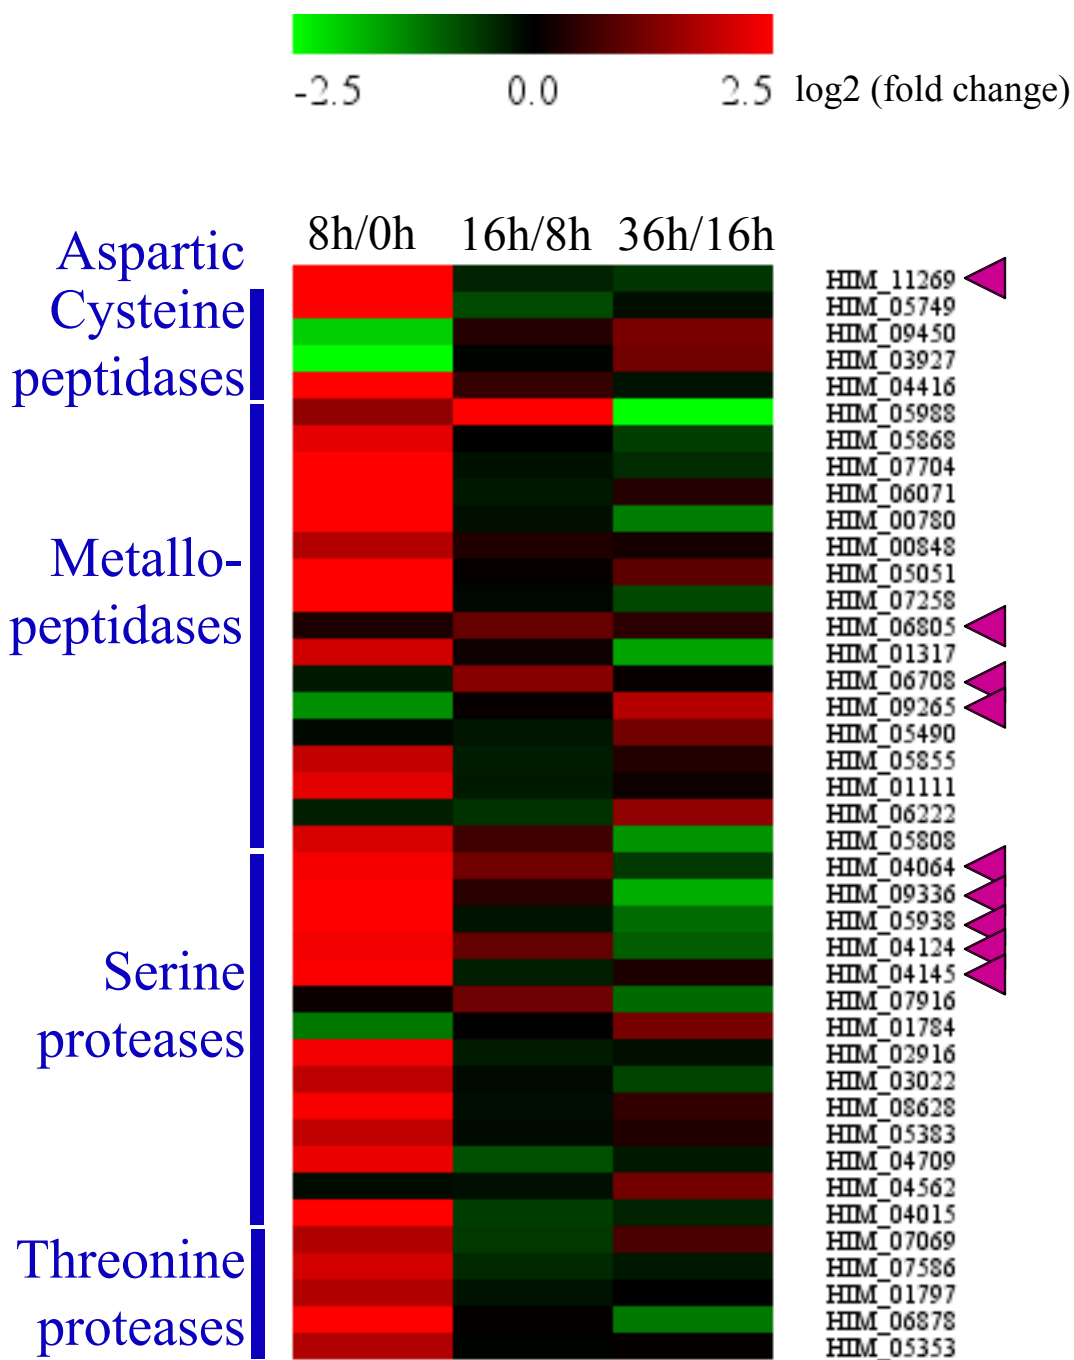

Fig. S8



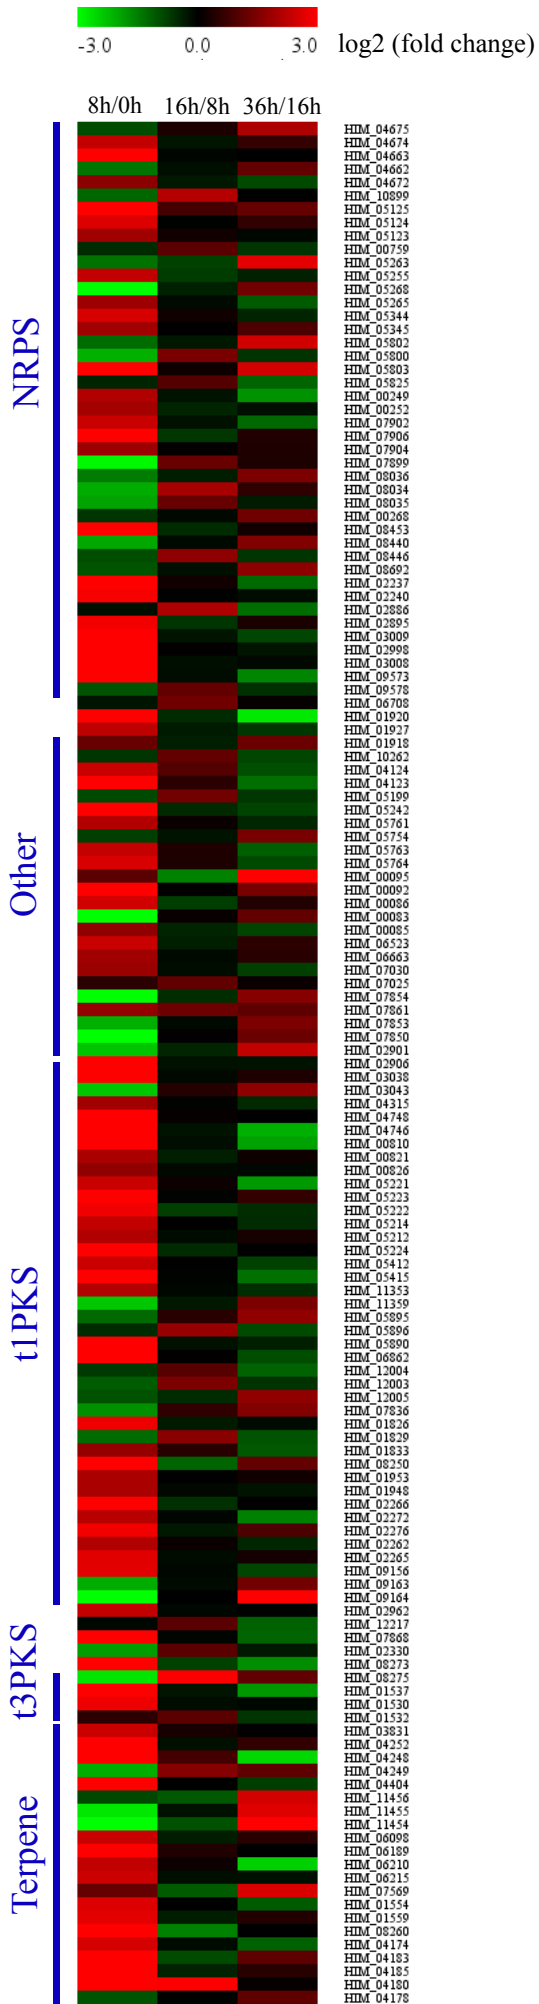

Fig. S9

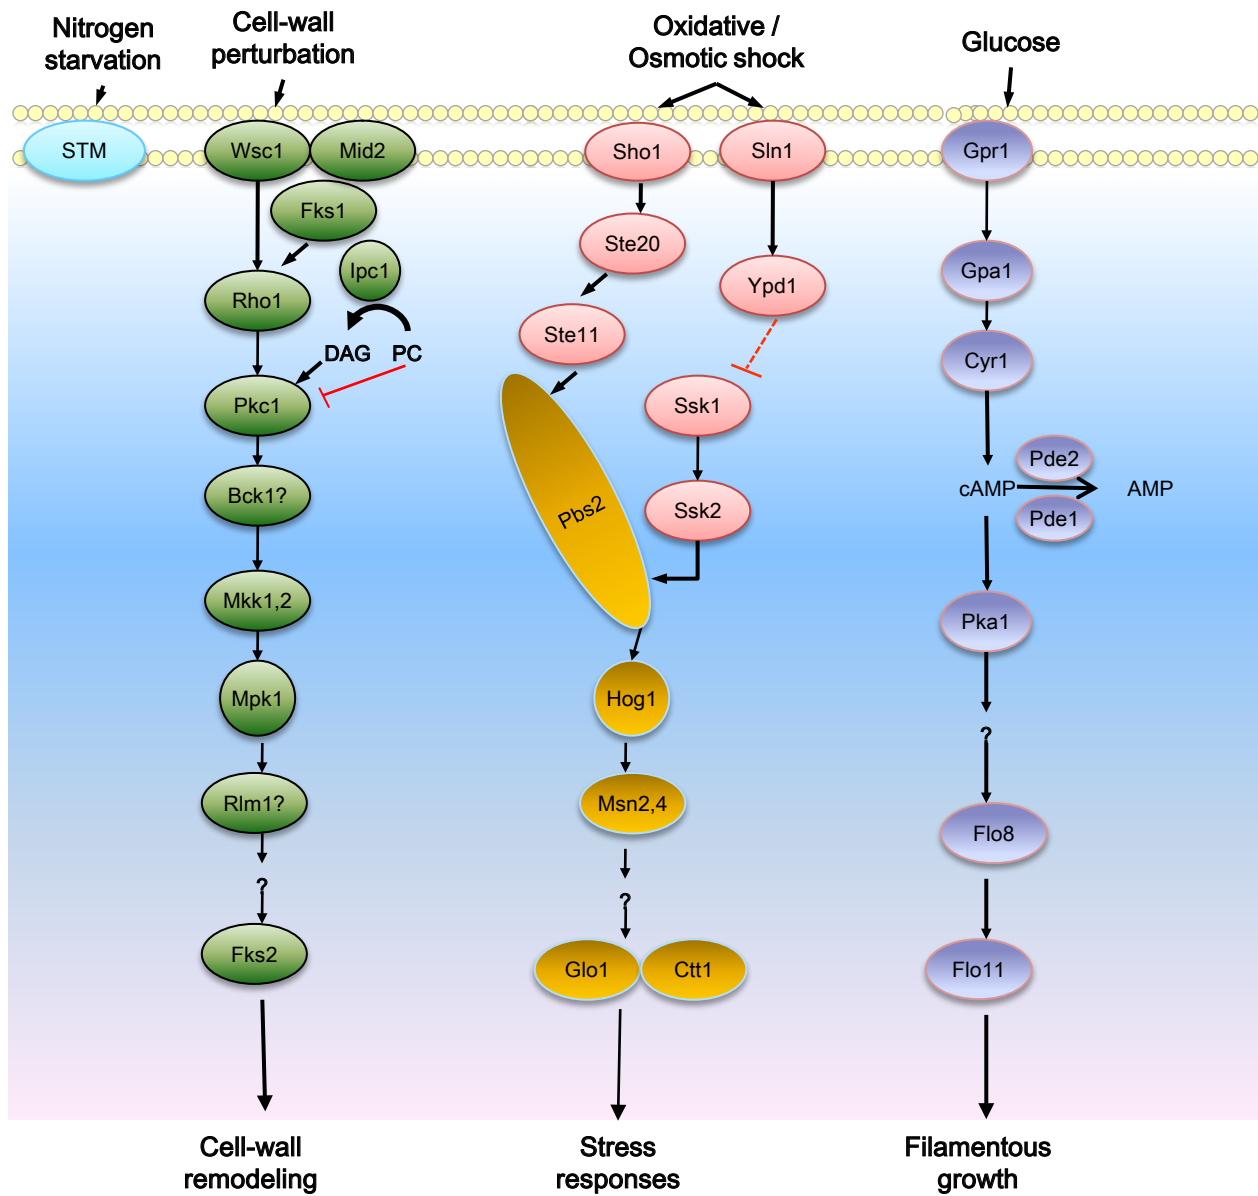

Fig. S10
